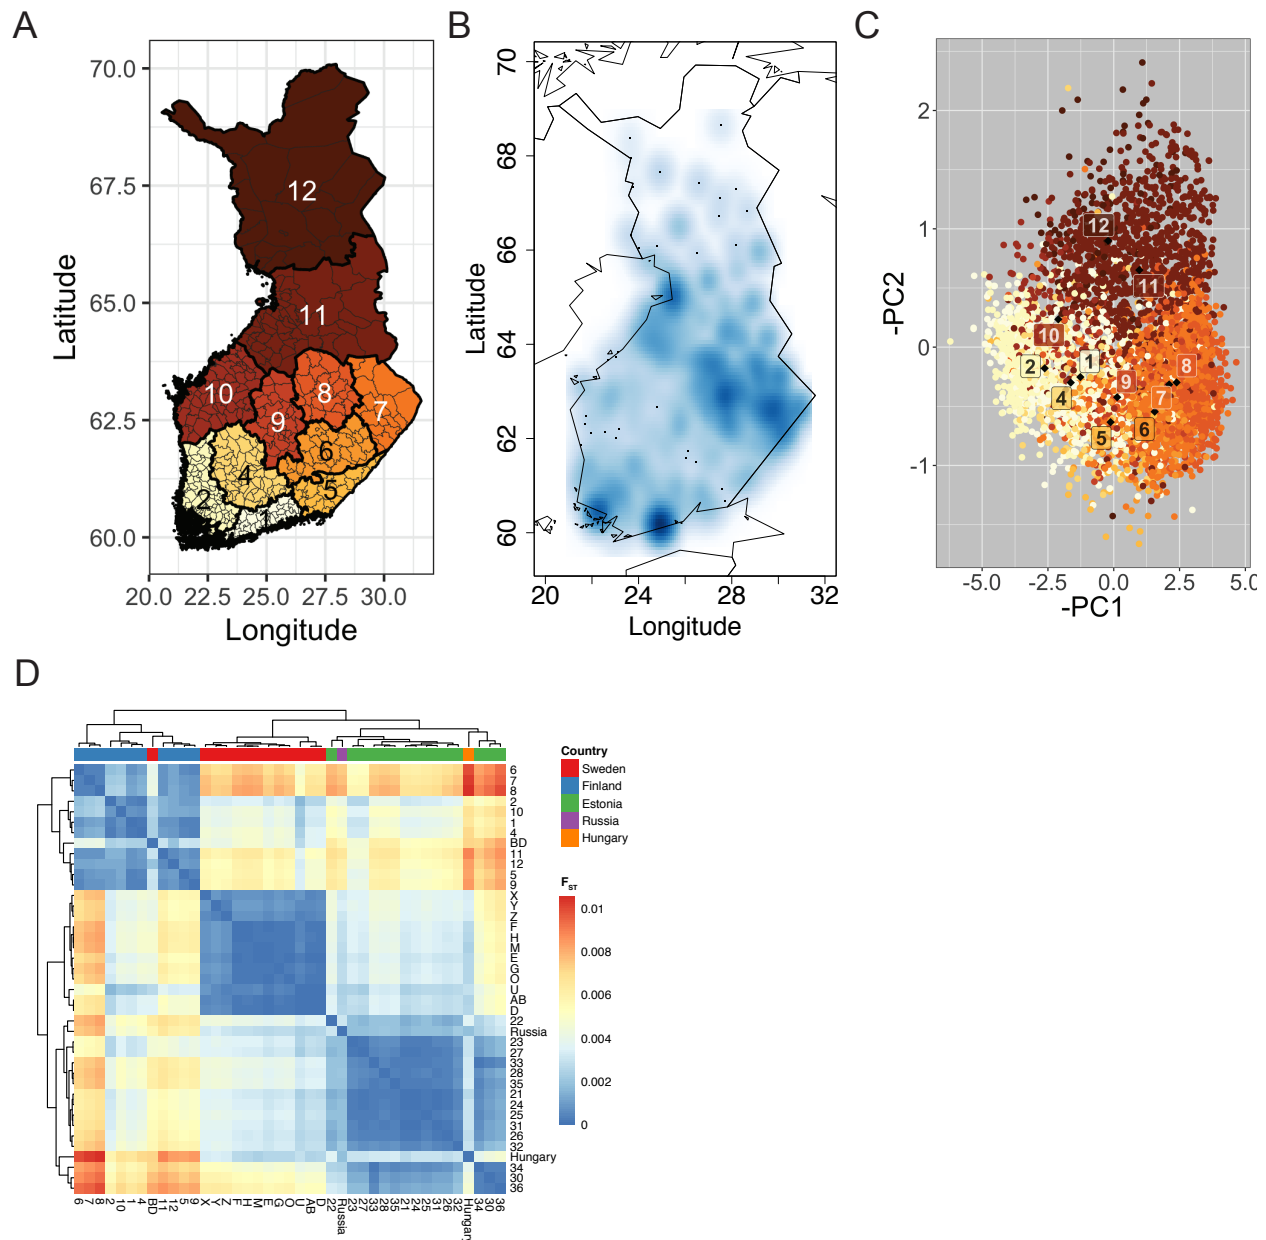

**Figure S1** – Principal components analysis recapitulates geographical birth record data by region. A) Labeled map of Finland, as in Figure 1A, with colors highlighting regional differences. Notably, forced relocation uprooted many individuals and communities following WWII for example, when Finland ceded its eastern parts (e.g. Karelia) to the Soviet Union and resettled everyone living in the lost areas into the remaining parts of

the country<sup>1</sup>. B) Smoothed geographical density map of all Finrisk97 samples with birth record data at the centroids of municipalities (N=5,448). Regional-level birth records not shown. C) PCA positions for all Finrisk97 samples with birth record data. Numbers label the average PC coordinates for all individuals born in a region. Colors are as in A). D) Clustered  $F_{ST}$  heat map between individuals born in different regions of Finland, Sweden, Estonia, St Petersburg, Russia, and Hungary. Regions with fewer than 10 individuals were not included. Region labels and names are as in **Table S3**.

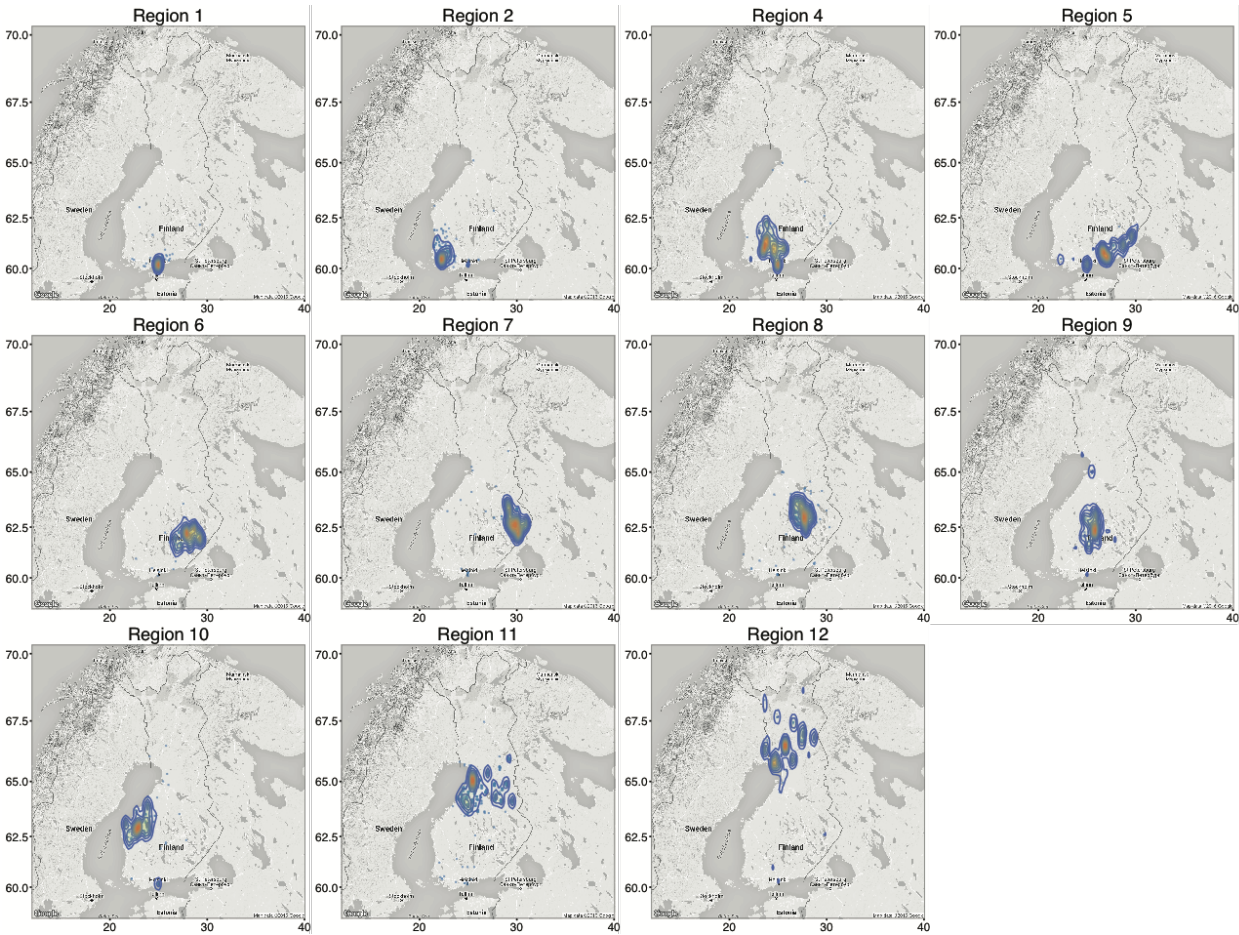

**Figure S2** – Birthplace of offspring whose parents are both born in the same region (N=3,132), as indicated by panel titles.

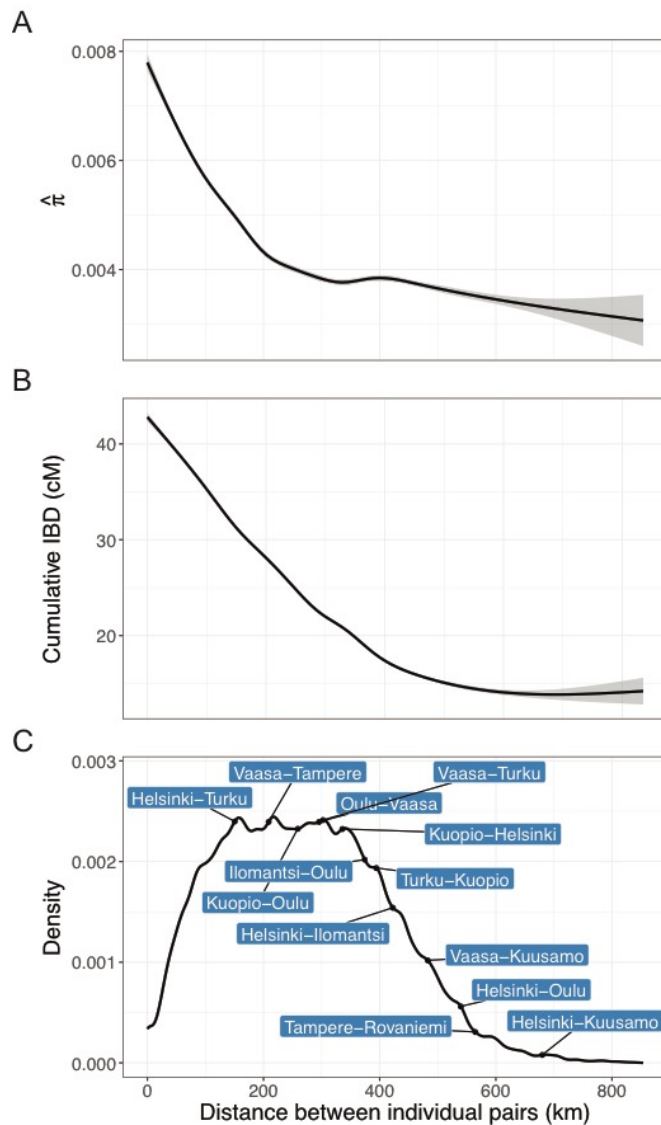

**Figure S3 – Geographical distance between pairs of Finnish individuals and genetic sharing.** A) Pairwise genetic sharing among unrelated individuals by geographical distance. B) Cumulative IBD sharing (minimum haplotype length  $\geq 3$  cM) across the genome among unrelated individuals by geographical distance. C) Density of

- 1 genetic distance between pairs of individuals by geographical distance. The distance
- 2 between representative city pairs are shown in blue.

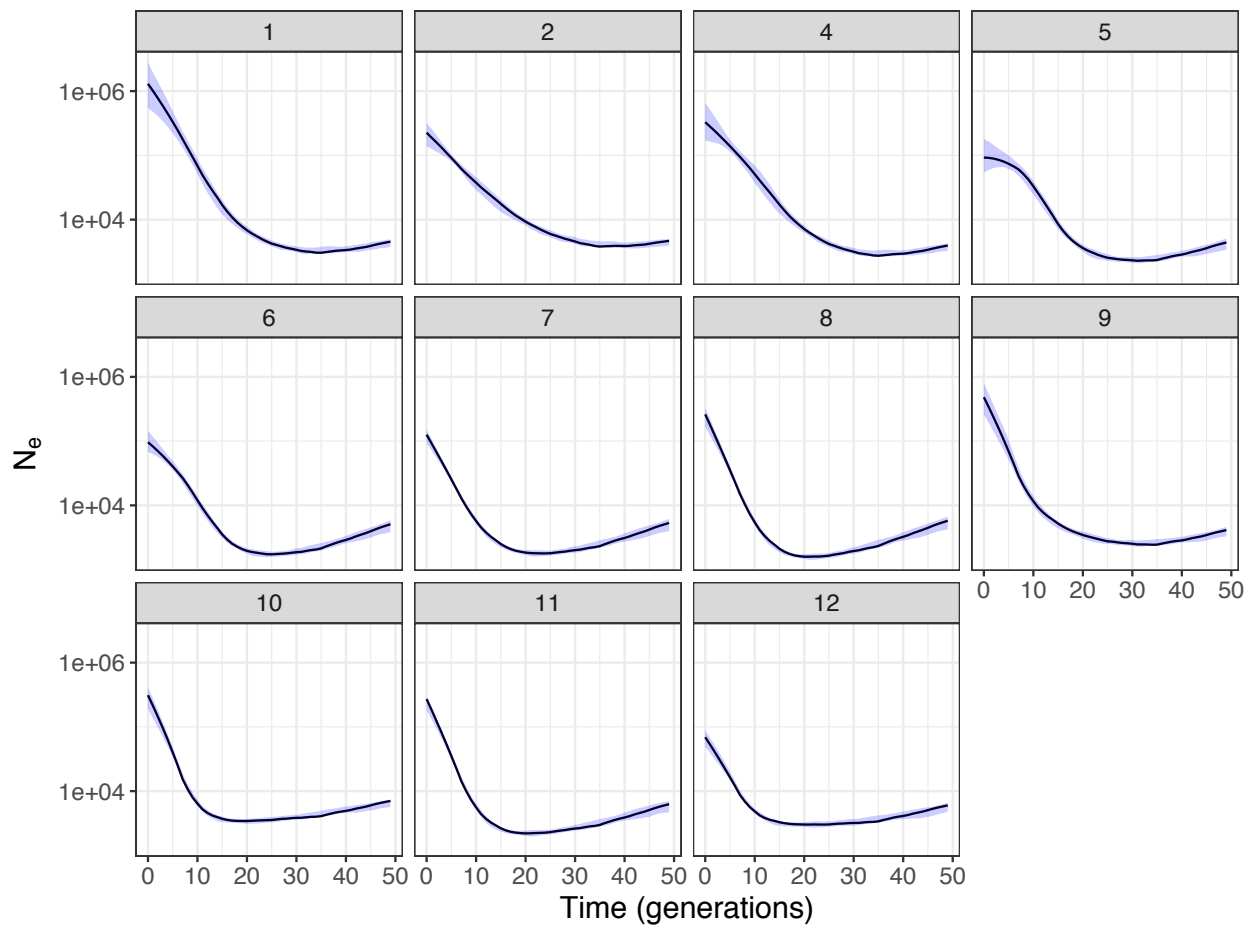

- 3
- 4 **Figure S4 – Effective population size change over time by region of Finland.**
- 5 Number of individuals in each region are: 1: 1,123, 2: 1,078, 4: 378, 5: 224, 6: 304, 7:
- 6 1,581, 8: 1,547, 9: 225, 10: 288, 11: 1,697, 12: 184.
- 7

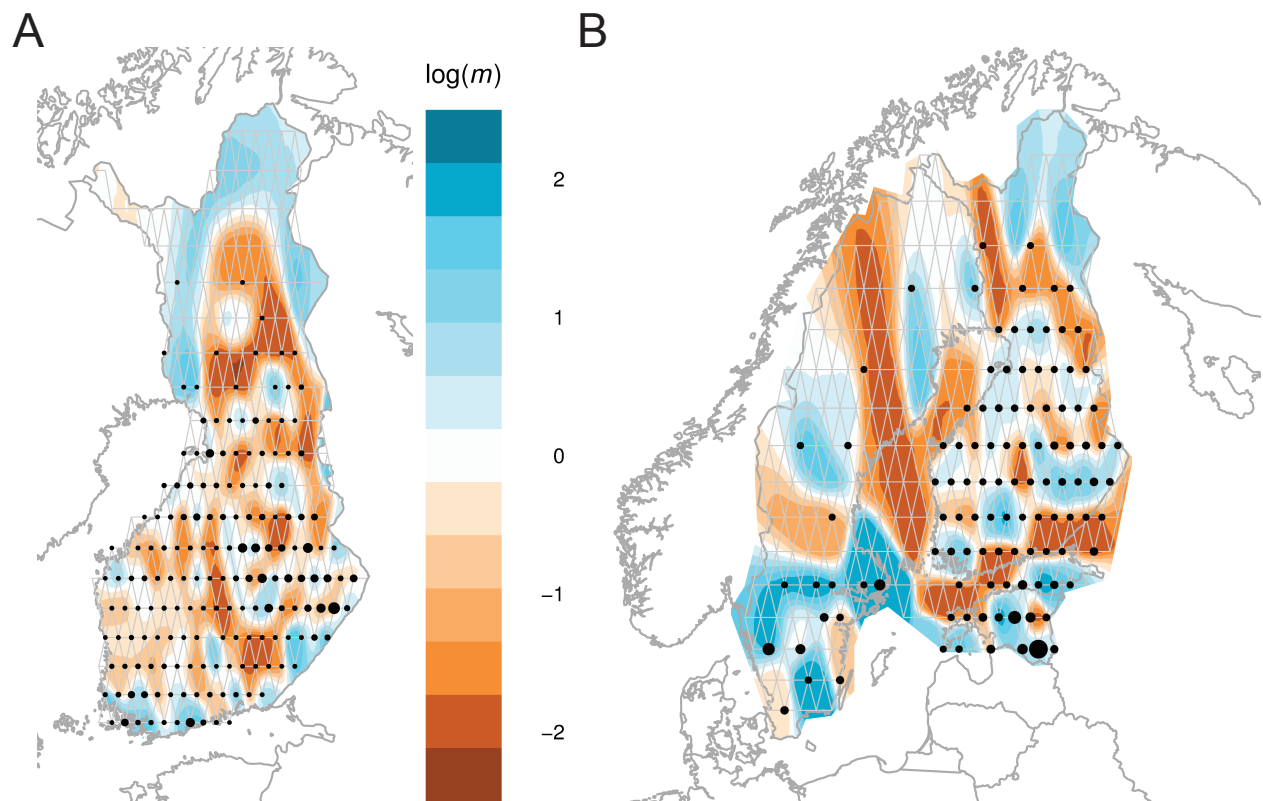

**Figure S5 – Deme assignment for EEMS analyses in/near Finland.** Black dots at center of demes are proportional to sample size. A) Finland deme assignment from municipality-level birth records. B) Deme assignment in Finland with municipality-level birth records and for region-level birth records in neighboring countries/regions of Sweden, Estonia, and St. Petersburg, Russia.

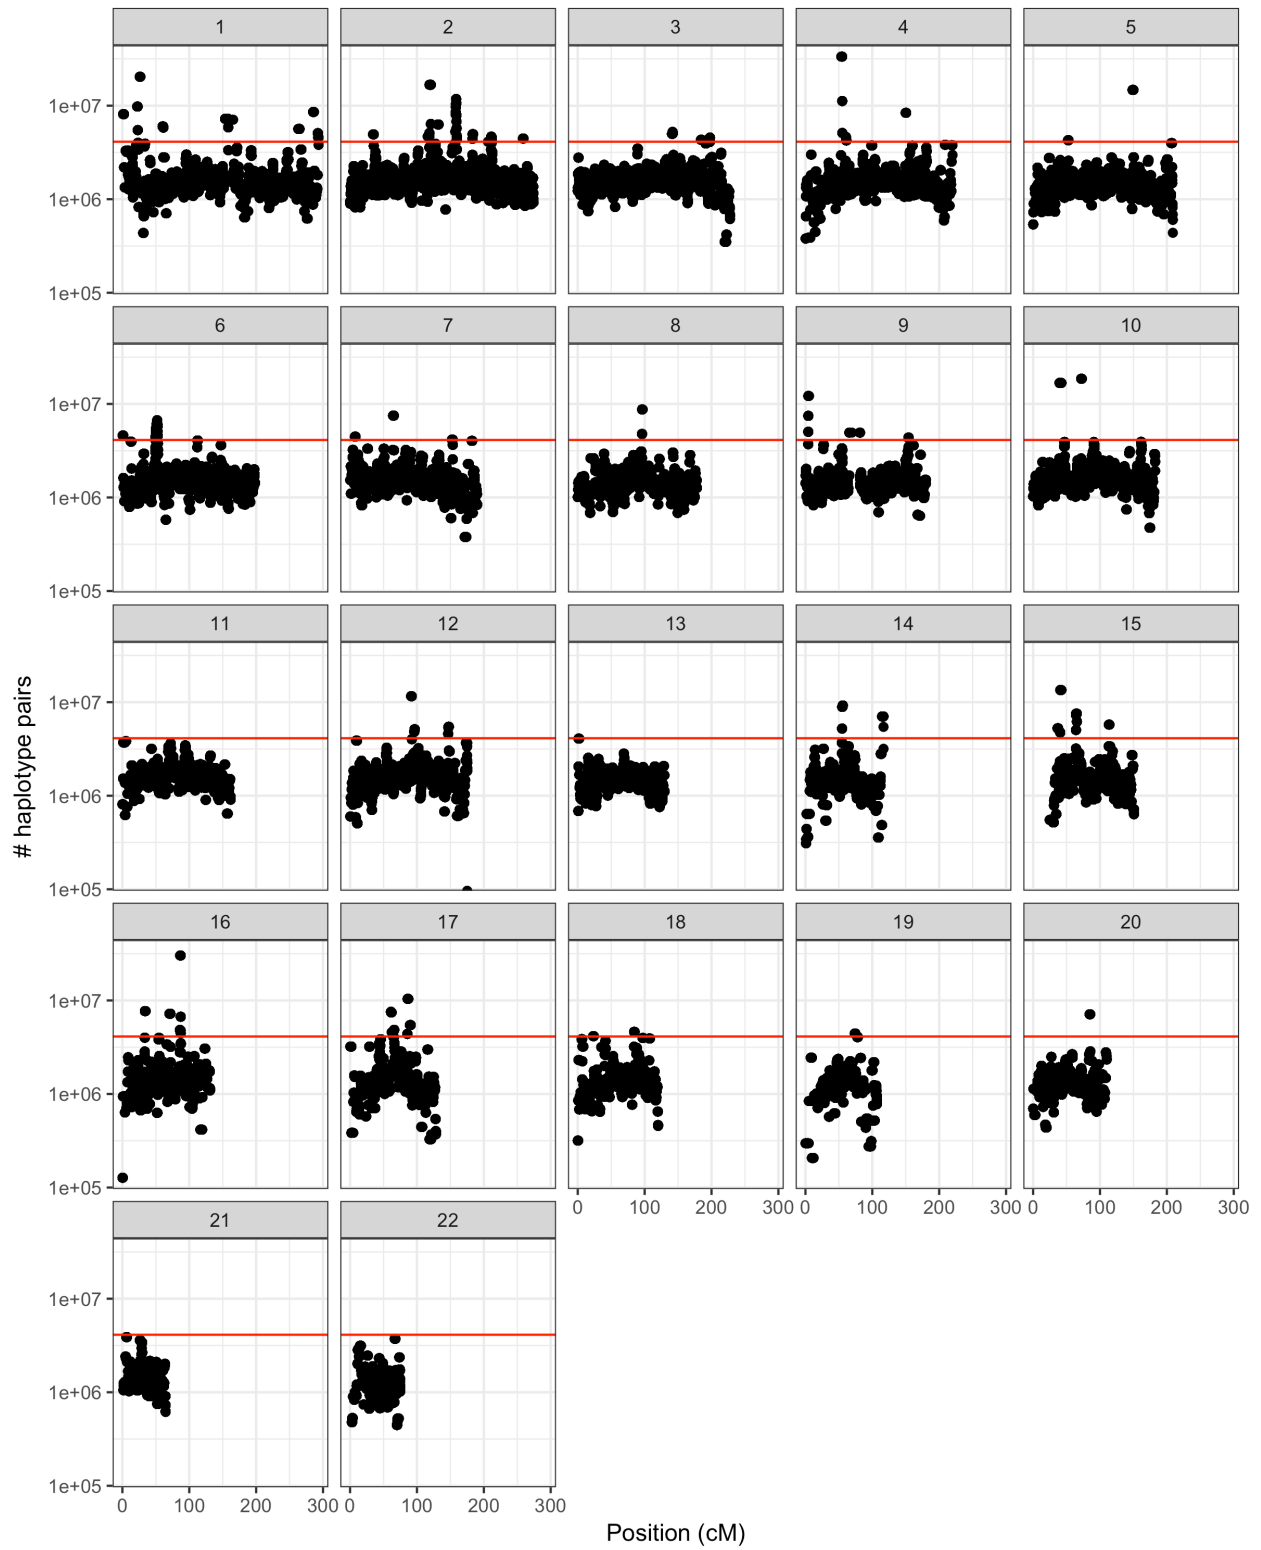

1

6

1 **Figure S6 – Haplotype sharing rate genome-wide by chromosome.** At each best-  
2 guess genotype used to call haplotypes, we quantified the number of pairs of individuals  
3 who shared haplotypes. Included individuals are unrelated and have corresponding  
4 exome sequencing data (N=9,363). Red line indicates the mean sharing plus 3 \*  
5 standard deviation. Total possible number of pairs is  $\binom{N}{2} = 43,828,203$ .

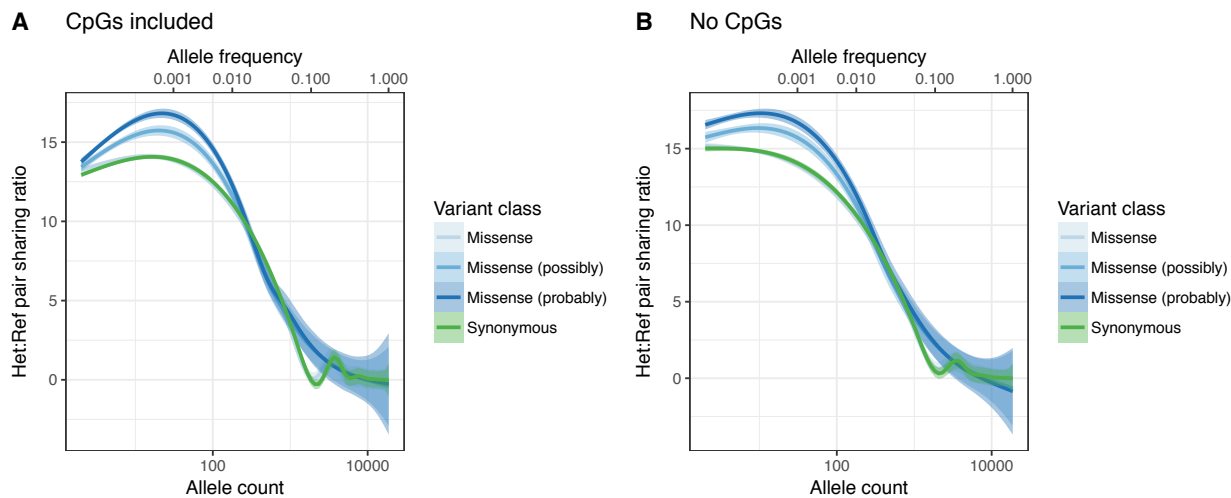

6  
7 **Figure S7 – Depletion of haplotype sharing at CpG sites shows evidence of**  
8 **mutational recurrence.** A) Enrichment of haplotype sharing across all variants. B)  
9 Enrichment of haplotype sharing across non-CpG variants.



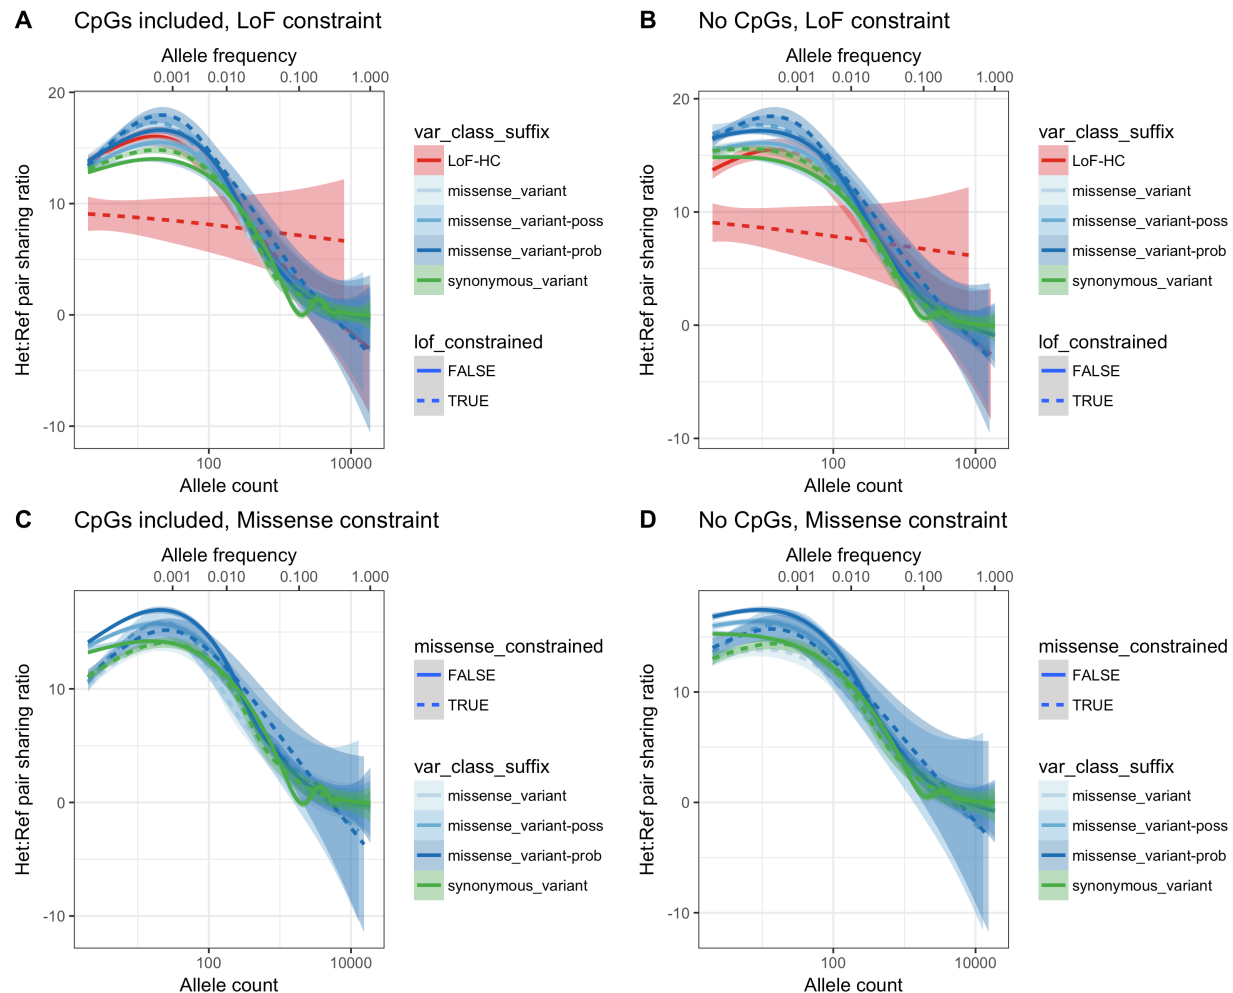

**Figure S8 – Depletion of haplotype sharing in missense and loss-of-function**

**(LoF) constrained regions.** As calculated in Lek et al, missense constraint indicates regions depleted of missense variation, and LoF constrained regions indicate regions depleted of LoF variation <sup>2</sup>.

**Table S1 – Finnish sample genotyping summaries.** Note that some FINRISK

samples with birth records have been included as controls for multiple different projects.

| Population | Array          | Project name | SNPs genotyped | Sample size |
|------------|----------------|--------------|----------------|-------------|
| Finland    | Affymetrix 6.0 | MIGen        | 666,979        | 339         |
| Finland    | Illumina 370k  | NFBC         | 324,674        | 5,363       |



|         |                               |                    |         |        |
|---------|-------------------------------|--------------------|---------|--------|
| Finland | Illumina 610k                 | Corogene, GenMets  | 535,787 | 6,240  |
| Finland | Illumina 670k                 | HBCS, YFS, FTC     | 521,500 | 6,492  |
| Finland | Illumina CoreExome            | FINRISK, CoreEX    | 322,929 | 10,641 |
| Finland | Illumina CoreExome            | ENGAGE             | 342,869 | 11,639 |
| Finland | Illumina OmniExpress          | PredictCVD, SUMMIT | 606,310 | 2,542  |
| Sweden  | Illumina OmniExpress          | Sw5                | 733,202 | 4,465  |
| Sweden  | Illumina OmniExpress          | Sw6                | 733,202 | 3,873  |
| Hungary | Illumina OmniExpressExome     | HTB                | 943,987 | 506    |
| Estonia | Illumina OmniExpress          | EGCUT              | 710,831 | 6,946  |
| Russia  | Illumina GlobalScreeningArray | RussiaSiege        | 633,183 | 262    |
| TOTAL   |                               |                    |         | 59,309 |

- 1
- 2 **Table S2 – Birth record data by cohort.** Municipality-level birth records were available
- 3 for FR97, regional-level birth records were available for FR07 for this study.

| Project/Array      | FR07 | FR97 <sup>4</sup> |
|--------------------|------|-------------------|
| ENGAGE             | 0    | 3969              |
| FIN610K            | 634  | 458 <sup>5</sup>  |
| MIGen              | 0    | 110               |
| FINRISK, CoreEX    | 3065 | 0 <sup>6</sup>    |
| PredictCVD, SUMMIT | 243  | 911 <sup>7</sup>  |
| TOTAL (N=9,390)    | 3942 | 5448              |

- 8 **Table S3 – Region names by country in Finland, Sweden, and Estonia.**

| Country | Code | Name                  |
|---------|------|-----------------------|
| Finland | 1    | Southern Finland      |
| Finland | 2    | Southwestern Finland  |
| Finland | 3    | Åland                 |
| Finland | 4    | Tavastia              |
| Finland | 5    | Southern Karelia      |
| Finland | 6    | Southern Savonia      |
| Finland | 7    | North Karelia         |
| Finland | 8    | Northern Savonia      |
| Finland | 9    | Central Finland       |
| Finland | 10   | Ostrobothnia          |
| Finland | 11   | Northern Ostrobothnia |
| Finland | 12   | Lapland               |
| Sweden  | AB   | Stockholm             |
| Sweden  | AC   | Västerbotten          |
| Sweden  | BD   | Norrbottn             |

|         |    |                 |
|---------|----|-----------------|
| Sweden  | C  | Uppsala         |
| Sweden  | D  | Södermanland    |
| Sweden  | E  | Östergötland    |
| Sweden  | F  | Jönköping       |
| Sweden  | G  | Kronoberg       |
| Sweden  | H  | Kalmar          |
| Sweden  | I  | Gotland         |
| Sweden  | K  | Blekinge        |
| Sweden  | M  | Skåne           |
| Sweden  | N  | Halland         |
| Sweden  | O  | Västra Götaland |
| Sweden  | S  | Värmland        |
| Sweden  | T  | Orebro          |
| Sweden  | U  | Västmanland     |
| Sweden  | W  | Dalarna         |
| Sweden  | X  | Gävleborg       |
| Sweden  | Y  | Västernorrland  |
| Sweden  | Z  | Jämtland        |
| Estonia | 21 | Harju           |
| Estonia | 22 | Hiiu            |
| Estonia | 23 | Ida-Viru        |
| Estonia | 24 | Järva           |
| Estonia | 25 | Jõgeva          |
| Estonia | 26 | Lääne           |
| Estonia | 27 | Lääne-Viru      |
| Estonia | 28 | Pärnu           |
| Estonia | 29 | Peipsi          |
| Estonia | 30 | Põlva           |
| Estonia | 31 | Rapla           |
| Estonia | 32 | Saare           |
| Estonia | 33 | Tartu           |
| Estonia | 34 | Valga           |
| Estonia | 35 | Viljandi        |
| Estonia | 36 | Võru            |

1

2 **Table S4 – Exome sequencing data included in haplotype analyses.** Cohorts are  
3 ordered by number of individuals contributing to this study. Full descriptions of each  
4 cohort are in supplementary note.

| Cohort name               | Number of individuals included |
|---------------------------|--------------------------------|
| FINRISK_population_cohort | 7014                           |

|                |     |
|----------------|-----|
| IBD_FINRISK    | 845 |
| NFBC           | 525 |
| Health 2000    | 271 |
| FINRISK_AD     | 238 |
| Fusion         | 214 |
| UK10K          | 68  |
| Migraine       | 57  |
| METSIM         | 45  |
| Eufam          | 42  |
| NFID           | 30  |
| Twins_AD       | 25  |
| ADGEN          | 9   |
| IBD            | 4   |
| AUTISM_ASDFI   | 2   |
| AUTISM_TAMPERE | 1   |
| EPILEPSY_EPI25 | 1   |
| Botnia_T2D     | 1   |

1

## 2 References

- 3 1. Haukka J, Suvisaari J, Sarvimäki M, Martikainen P (2017) The Impact of Forced
- 4 Migration on Mortality. Epidemiology 28:587-593
- 5 2. Lek M, Karczewski KJ, Minikel EV, Samocha KE, Banks E, Fennell T, O'Donnell-
- 6 Luria AH, Ware JS, Hill AJ, Cummings BB, Tukiainen T, Birnbaum DP, Kosmicki JA,
- 7 Duncan LE, Estrada K, Zhao F, Zou J, Pierce-Hoffman E, Berghout J, Cooper DN,
- 8 Deflaux N, DePristo M, Do R, Flannick J, Fromer M, Gauthier L, Goldstein J, Gupta N,
- 9 Howrigan D, Kiezun A, Kurki MI, Moonshine AL, Natarajan P, Orozco L, Peloso GM,
- 10 Poplin R, Rivas MA, Ruano-Rubio V, Rose SA, Ruderfer DM, Shakir K, Stenson PD,
- 11 Stevens C, Thomas BP, Tiao G, Tusie-Luna MT, Weisburd B, Won H, Yu D, Altshuler
- 12 DM, Ardissino D, Boehnke M, Danesh J, Donnelly S, Elosua R, Florez JC, Gabriel SB,
- 13 Getz G, Glatt SJ, Hultman CM, Kathiresan S, Laakso M, McCarroll S, McCarthy MI,
- 14 McGovern D, McPherson R, Neale BM, Palotie A, Purcell SM, Saleheen D, Scharf JM,

- 1 Sklar P, Sullivan PF, Tuomilehto J, Tsuang MT, Watkins HC, Wilson JG, Daly MJ,
- 2 MacArthur DG (2016) Analysis of protein-coding genetic variation in 60,706 humans.
- 3 Nature 536:285-291
